# Supplementary material for: From structural phase transition to highly sensitive lifetime based luminescent thermometer: multifaceted modification of thermometric performance in Y0.9−xNdxYb0.1PO4 nanocrystals
Source: Royal Society of Chemistry journal article supplement (doi:10.1039/d1tc04107j), 2021-01-01
Supplement: d1tc04107j1.pdf [file d1tc04107j1.pdf]

## Supporting Information

# From structural phase transition to highly sensitive lifetime based luminescent thermometer: multifaceted modification of thermometric performance in $Y_{0.9-x}Nd_xYb_{0.1}PO_4$ nanocrystals

K. Maciejewska<sup>1\*</sup>, M. Szalkowski<sup>1</sup>, A. Bednarkiewicz<sup>1</sup>, L. Marciniak<sup>1\*</sup>

<sup>1</sup>Institute of Low Temperature and Structure Research, Polish Academy of Sciences, Okólna  
2, 50-422 Wrocław, Poland

\* corresponding author: [k.maciejewska@intibs.pl](mailto:k.maciejewska@intibs.pl) [l.marciniak@intibs.pl](mailto:l.marciniak@intibs.pl)

**KEYWORDS** *luminescent thermometry, lifetime,  $Yb^{3+}$ , phonon-assisted, orthophosphates*

Luminescence decay profiles were fitted using the double-exponential function:

$$I(t) = A_1 \cdot e^{\frac{-t}{\tau_1}} + A_2 \cdot e^{\frac{-t}{\tau_2}} + y_0 \quad (1)$$

The average lifetime was calculated as follows:

$$\tau_{avr} = \frac{A_1\tau_1^2 + A_2\tau_2^2}{A_1\tau_1 + A_2\tau_2} \quad (2)$$

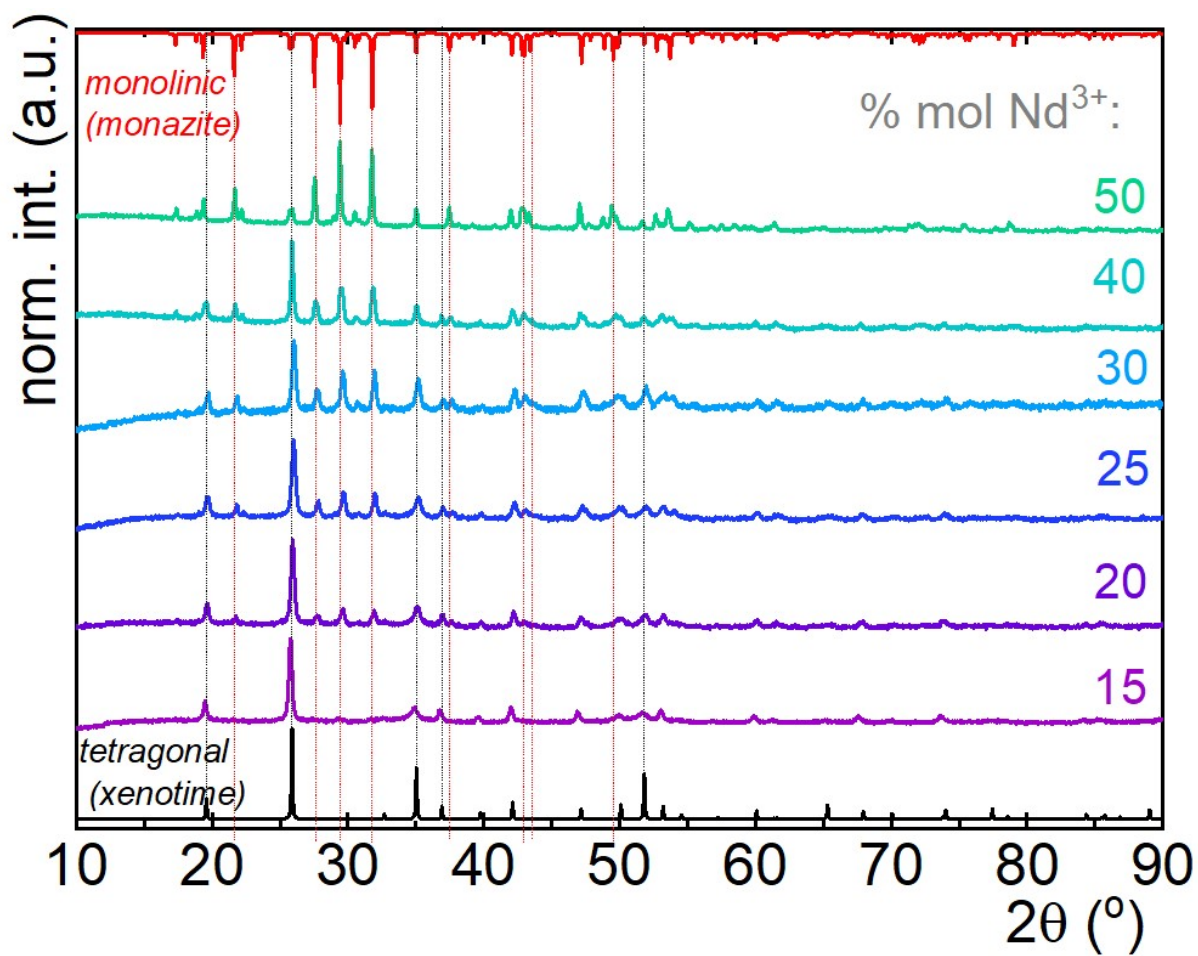

**Figure S1.** The XRD patterns of  $Y_{0.9-x}Nd_xYb_{0.1}PO_4$  where  $x$ : 0.15, 0.2, 0.25, 0.30, 0.40, 0.50.

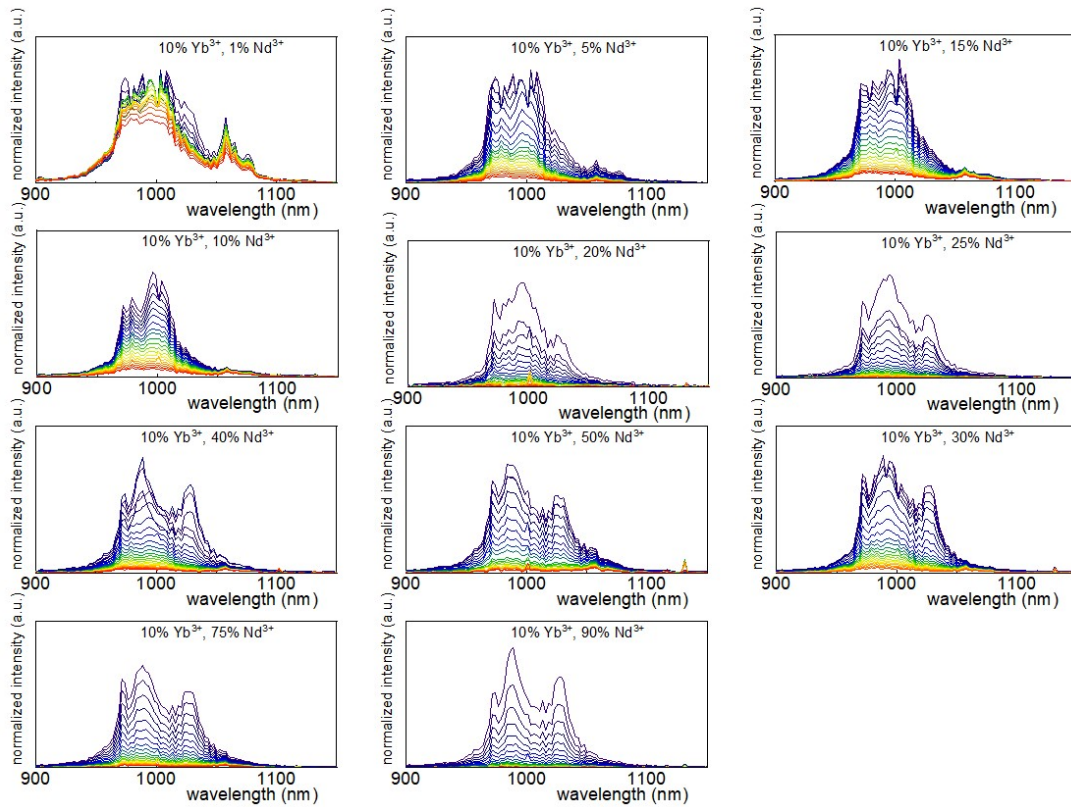

**Figure S2.** The thermal evolution of emission of  $Y_{0.9-x}Nd_xYb_{0.1}PO_4$  upon 808 nm excitation line measured in the temperature range of 123-563K.

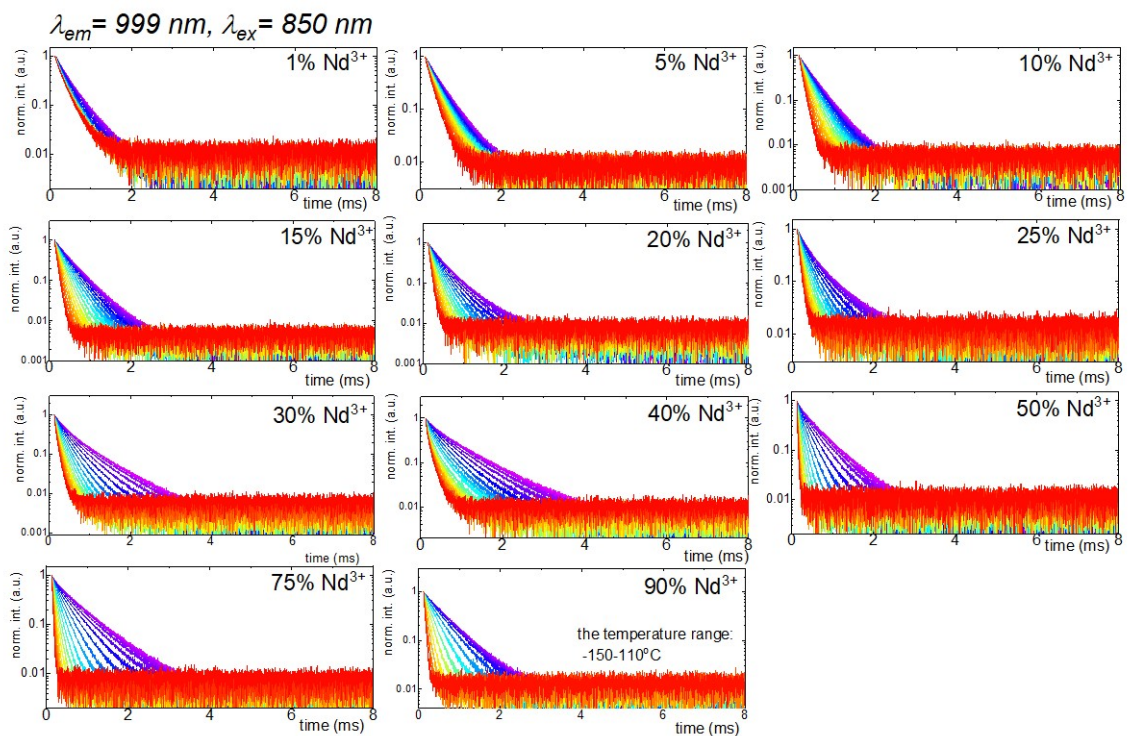

**Figure S3.** The thermal evolution of decay profiles of  $Y_{0.9-x}Nd_xYb_{0.1}PO_4$  upon  $\lambda_{ex} = 808 \text{ nm}$  ( $\lambda_{em} = 999 \text{ nm}$ ) measured in the temperature range of 123-563K.

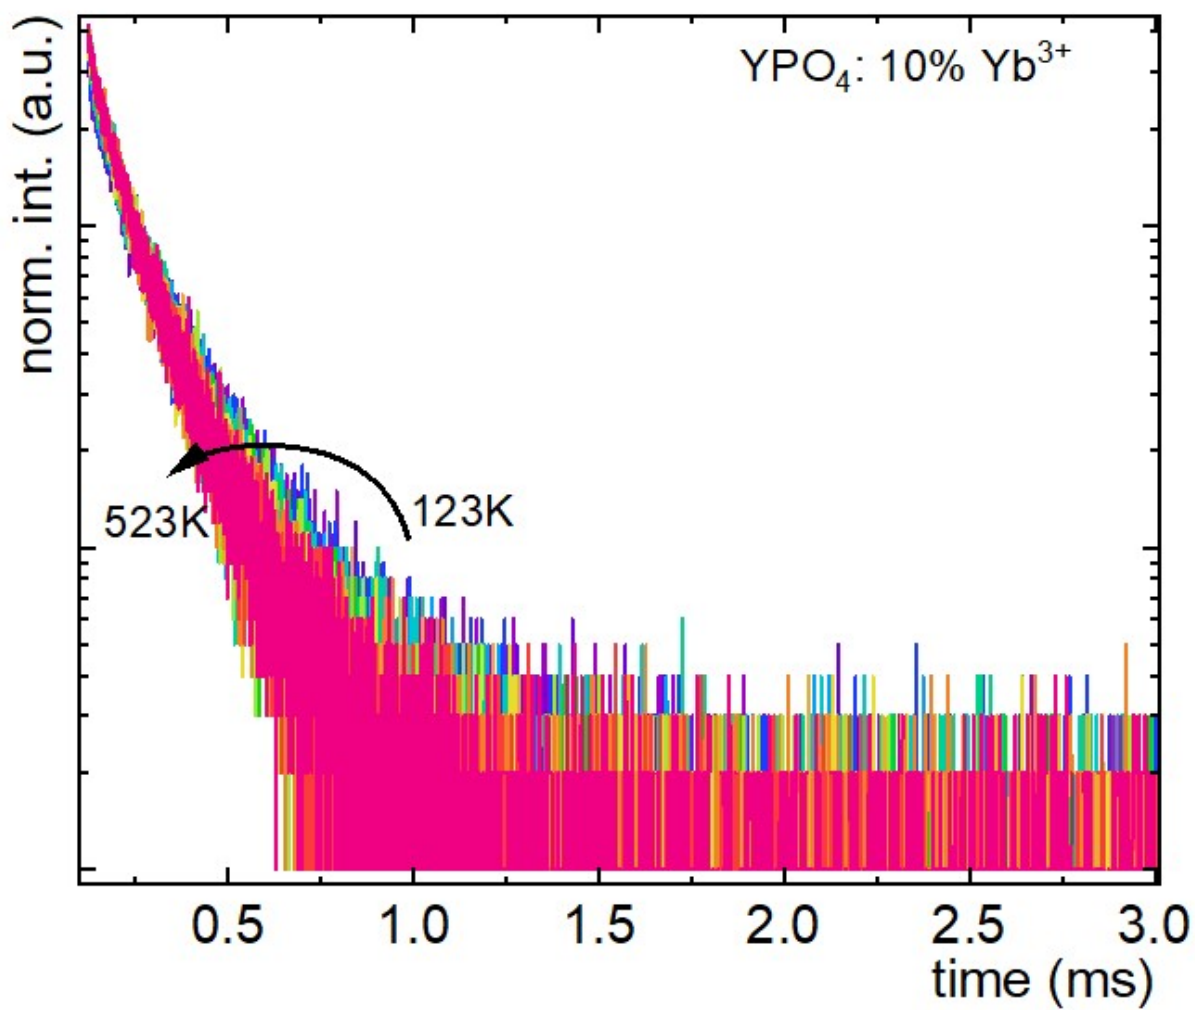

**Figure S4.** The thermal evolution of luminescence decay profile of Yb<sup>3+</sup> ions in Y<sub>0.9</sub>Yb<sub>0.1</sub>PO<sub>4</sub> nanocrystals.

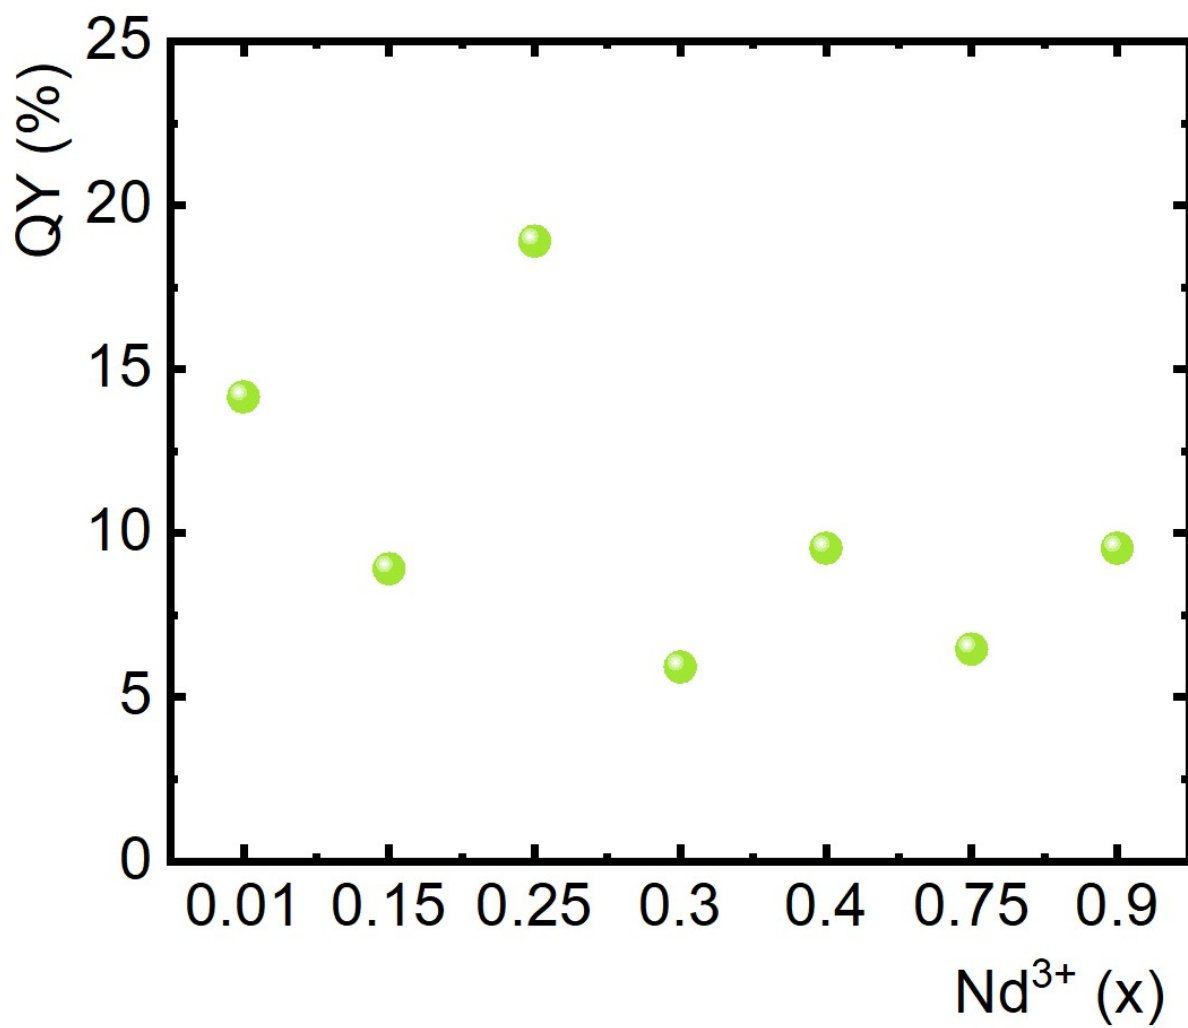

**Figure S5.** The luminescence quantum efficiency (QY) measured for  $Y_{0.9-x}Nd_xYb_{0.1}PO_4$  upon  $\lambda_{ex}=808$  nm as a function of  $Nd^{3+}$  concentration.

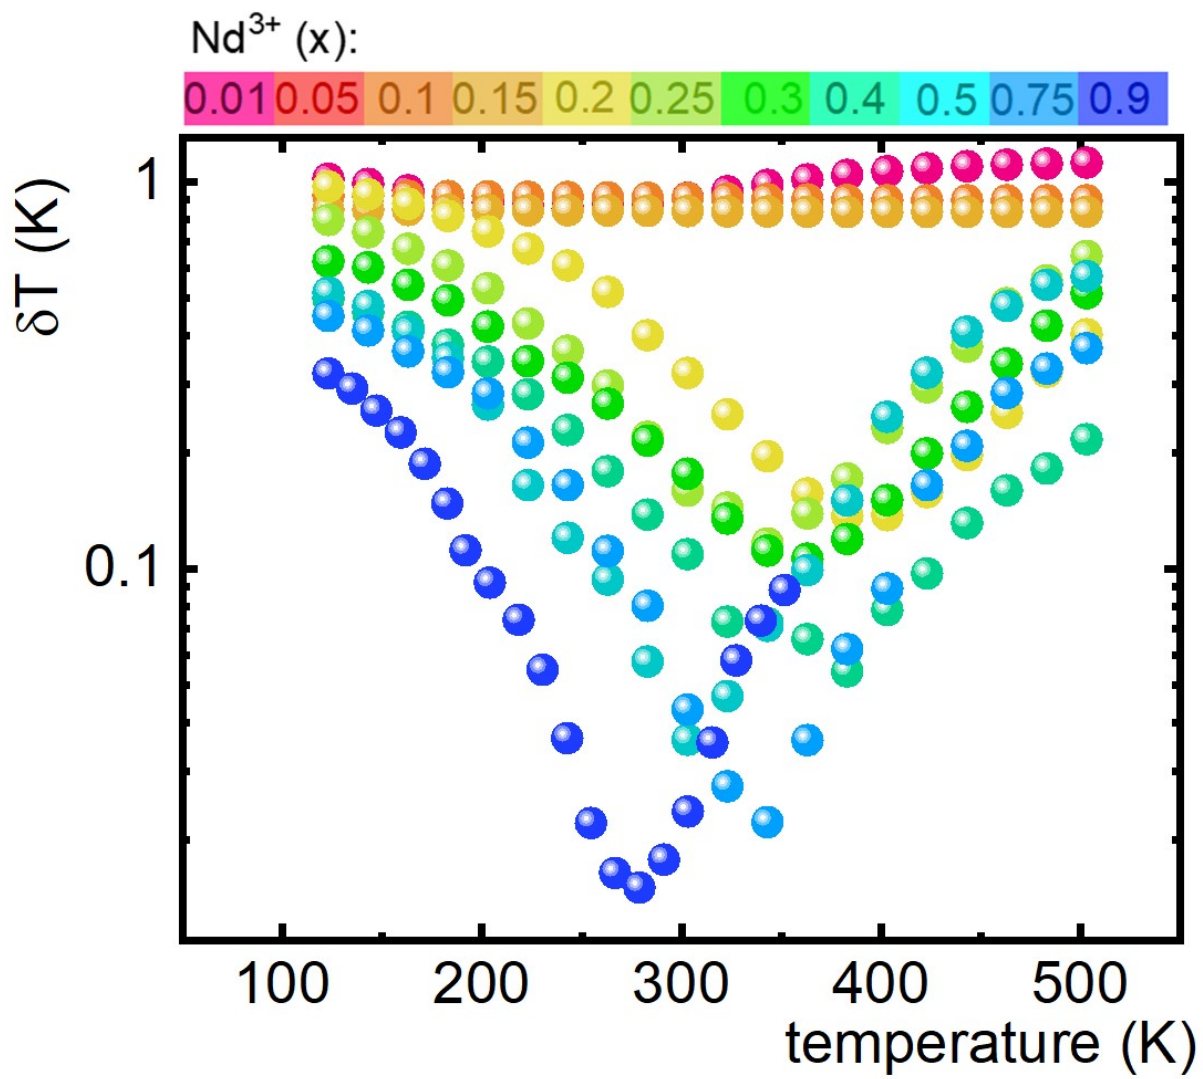

**Figure S6.** The temperature resolution of luminescent thermometers based on  $Y_{0.9-x}Nd_xYb_{0.1}PO_4$  nanocrystals.
